# Supplementary material for: Metagenomic Analysis of a Tropical Composting Operation at the São Paulo Zoo Park Reveals Diversity of Biomass Degradation Functions and Organisms
Source: PLoS One. 2013 Apr 24;8(4):e61928. doi: 10.1371/journal.pone.0061928 (PMC3637033; doi:10.1371/journal.pone.0061928)
Supplement: Table S4 — Diversity of Lactobacillus in ZC2. (XLSX) [file pone.0061928.s007.xlsx]

## Sheet: Table S4
Table S4. Diversity of Lactobacillus in ZC2
Species	BLASTN-RDP	BLASTN-NT	BLASTX-M5NR	Strain	Genome	Genbank Id	Chromosome size	Plasmids	Plasmid size	Genome size
Lactobacillus acidipiscis	114	79	98	KCTC 13900	Draft	NZ_BACS00000000.1				2.29
Lactobacillus acidophilus		1323	35797	30SC	Complete	NC_015214.1	2.078	2	7.19/12.56	2.09
				NCFM	Complete	NC_006814.3	1.99	0		1.99
				ATCC 4796	Draft	NZ_ACHN00000000.1				2
Lactobacillus alimentarius	5		25
Lactobacillus amylolyticus			8117	DSM 11664	Draft	NZ_ADNY00000000.1				1.54
Lactobacillus amylovorus	3	3219	13422	GRL1118	Complete	NC_017470.1	1.89	2	4.54/78.14	1.97
				GRL1112	Complete	NC_014724.1	2.06	2	25.28/33.68	2.12
Lactobacillus animalis	17		6	KCTC 3501	Draft	NZ_AEOF00000000.1				1.87
Lactobacillus antri			19582	DSM 16041	Draft	NZ_ACLL00000000.1				2.24
Lactobacillus bifermentans	11
Lactobacillus brevis	13	2951	105995	ATCC 367	Complete	CP000416	2.29	2	13.41/35.59	2.34
				ATCC 27305	Draft	NZ_ACGG00000000.1				3.08
Lactobacillus buchneri	1	1307	16749	NRRL B-30929	Complete	NC_015428.1	2.5	3	52.69/18.51/10.79	2.58
				CD034	Complete	NC_018610.1	2.5	1	56.47	2.55
				ATCC 11577	Draft	NZ_ACGH00000000.1				2.86
Lactobacillus camelliae	8
Lactobacillus casei		2744	98105	BD-II	Complete	NC_017474.1	3.06	1	57.36	3.12
				str. Zhang	Complete	NC_014334.1	2.86	1	36.48	2.89
				ATCC 334	Complete	NC_008526.1	2.89	1	29.06	2.92
				LC2W	Complete	NC_017473.1	3.03	1	38.39	3.07
				BL23	Complete	NC_010999.1	3.08			3.08
Lactobacillus coleohominis	1		12536	101-4-CHN	Draft	NZ_ACOH00000000.1				1.7
Lactobacillus collinoides			78
Lactobacillus composti	6
Lactobacillus coryniformis	4		235	KCTC 3167	Draft	NZ_AELK00000000.1				2.74
				CECT 5711	Draft	AKFP00000000.1				2.84
				KCTC 3535	Draft	NZ_AEOS00000000.1				2.82
Lactobacillus crispatus	3	3181	30437	ST1	Complete	NC_014106.1	2.04			2.04
				125-2-CHN	Draft	NZ_ACPV00000000.1				2.13
				214-1	Draft	NZ_ADGR00000000.1				2.07
				CTV-05	Draft	NZ_ADML00000000.1				2.3
				JV-V01	Draft	NZ_ACKR00000000.1				2.07
				MV-1A-US	Draft	NZ_ACOG00000000.1				2.17
				MV-3A-US	Draft	NZ_ACOG00000000.1				2.29
				SJ-3C-US	Draft	ADDT00000000.1				2.09
Lactobacillus crustorum	15		21
Lactobacillus curvatus			1114	CRL 705	Draft	NZ_AGBU00000000.1				1.84
Lactobacillus delbrueckii	1	68	30526	ATCC 11842	Complete	NC_008054.1	1.87			1.87
				ND02	Complete	NC_014727.1	2.12	1	6.22	2.13
				2038	Complete	NC_017469.1	1.87			1.87
				ATCC BAA-365	Complete	NC_008529.1	1.86			1.86
				CNCMI-1519	Draft	AGHW00000000.1				1.8
				CNCMI-1632	Draft	AGFO00000000.1				1.77
				PB2003/044-T3-4	Draft	NZ_AEAT00000000.1				1.98
				DSM 20072	Draft	AEXU00000000.1				1.88
Lactobacillus dextrinicus	6		26
Lactobacillus farciminis	270	335	44	KCTC 3681	Draft	NZ_AEOT00000000.1				2.47
Lactobacillus fermentum	14	7799	56862	CECT 5716	Complete	NC_017465.1	2.1	0		2.1
				IFO 3956	Complete	NC_010610.1	2.09	0		2.09
				28-3-CHN	Draft	NZ_ACQG00000000.1				1.96
				ATCC 14931	Draft	NZ_ACGI00000000.1				1.8
Lactobacillus gasseri		68	41958	ATCC 33323	Complete	NC_008530.1	1.89	0		1.89
				202-4	Draft	NZ_ACOZ00000000.1				1.82
				224-1	Draft	NZ_ADFT00000000.1				2.01
				CECT 5714	Draft	AKFQ00000000.1				1.91
				JV-V03	Draft	NZ_ACGO00000000.2				2.01
				MV-22	Draft	NZ_ABWH00000000.2				1.93
				SJ-9E-US	Draft	ADDU00000000.1				1.78
				SV-16A-US	Draft	ADDY00000000.1				1.99
Lactobacillus helveticus	1	1082	33063	H10	Complete	NC_017467.1	2.14	1		2.17
				DPC 4571	Complete	NC_010080.1	2.08	0		2.08
				R0052	Complete	NC_018528.1	2.13	0		2.13
				DSM 20075	Draft	NZ_ACLM00000000.1				1.81
				MTCC 5463	Draft	AEYL00000000.1				2.05
Lactobacillus hilgardii			15066	ATCC 8290	Draft	NZ_ACGP00000000.1				2.62
Lactobacillus iners			7712	LactinV 11V1-d	Draft	NZ_AEHN00000000.1				1.31
				ATCC 55195	Draft	NZ_AEPX00000000.1				1.22
				AB-1	Draft	NZ_ADHG00000000.1				1.29
				DSM 13335	Draft	NZ_ACLN00000000.1				1.27
				LEAF 2052A-d	Draft	NZ_AEKI00000000.1				1.32
				LEAF 2053A-b	Draft	NZ_AEKH00000000.1				1.37
				LEAF 2062A-h1	Draft	NZ_AEKJ00000000.1				1.3
				LEAF 3008A-a	Draft	NZ_AEKK00000000.1				1.27
				LactinV 01V1-a	Draft	NZ_AEHQ00000000.1				1.29
				LactinV 03V1-b	Draft	NZ_AEHP00000000.1				1.3
				LactinV 09V1-c	Draft	NZ_AEHO00000000.1				1.31
				SPIN 1401G	Draft	NZ_AEXP00000000.1				1.28
				SPIN 2503V10-D	Draft	NZ_AEHR00000000.1				1.28
				UPII 143-D	Draft	NZ_AEXJ00000000.1				1.26
				UPII 60-B	Draft	NZ_AEXK00000000.1				1.32
Lactobacillus jensenii			13589	JV-V16	Draft	NZ_CM000953.1	1.6			1.6
				115-3-CHN	Draft	NZ_ACQN00000000.1				1.62
				1153	Draft	NZ_ABWG00000000.2				1.74
				269-3	Draft	NZ_ACOY00000000.1				1.69
				27-2-CHN	Draft	NZ_ACOF00000000.1				1.61
				SJ-7A_US	Draft	NZ_ACQD00000000.1				1.68
Lactobacillus johnsonii	27	6344	40280	FI9785	Complete	NC_013504.1	1.75	2	3.47/25.65	1.78
				DPC 6026	Complete	NC_017477.1	1.96	0		1.96
				NCC533	Complete	NC_005362.1	1.99	0		1.99
				ATCC 33200	Draft	NZ_ACGR00000000.1				1.77
				pf01	Draft	AFQJ00000000.1				1.88
Lactobacillus kefiranofaciens		796	4	ZW3	Complete	NC_015602.1	2.11	2	194.76/46.29	2.35
Lactobacillus kitasatonis	6		1
Lactobacillus leichmannii			81
Lactobacillus mindensis	190	372	11
Lactobacillus mucosae	4	60	8	LM1	Draft	NZ_AHIT00000000.1				2.21
Lactobacillus namurensis	6		1
Lactobacillus nantensis	36	72	9
Lactobacillus nodensis	13
Lactobacillus oris	19		9888	PB013-T2-3	Draft	NZ_AEKL00000000.1				2.12
				F0423	Draft	AFTL00000000.1				2.17
Lactobacillus paracasei		241	43920	8700:2	Draft	NZ_ABQV01000000				2.98
				ATCC 25302	Draft	NZ_ACGY00000000.1				2.89
Lactobacillus paralimentarius	97	449	7
Lactobacillus paraplantarum			99
Lactobacillus pentosus	1	1734	530	KCA1	Draft	NZ_CM001538.1	3.43			3.43
Lactobacillus plantarum	9	10830	141077	ST-III	Complete	NC_014554.1	3.25	1	53.56	3.3
				JDM1	Complete	NC_012984.1	3.19	0		3.19
				WCFS1	Complete	AL935263.2	3.3	3	1.91/2.36/36.06	3.34
				ATCC 14917	Draft	NZ_ACGZ00000000.2				3.2
				NC8	Draft	AGRI00000000.1				3.21
Lactobacillus reuteri	6	3319	72939	SD2112	Complete	NC_015697.1	2.26	4	7.04/12.16/19.05/14.17	2.31
				JCM1112	Complete	NC_010609.1	2.04	0		2.04
				DSM20016	Complete	NC_009513.1	1.99	0		1.99
				100-23	Draft	NZ_AAPZ00000000.2				2.31
				ATCC 53608	Draft	CACS00000000.2				1.97
				CF48-3A	Draft	NZ_ACHG00000000.1				2.03
				MM2-3	Draft	NZ_ACLB00000000.1				1.94
				MM4-1A	Draft	NZ_ACGX00000000.2				2.07
				lpuph	Draft	AEAX00000000.1				2.12
				mlc3	Draft	AEAW00000000.1				2.02
Lactobacillus rhamnosus		352	46768	ATCC 8530	Complete	NC_017491.1	2.96	0		2.96
				Lc705	Complete	NC_013199.1	2968598	1		3.03311
				GG	Complete	NC_013198.1	3.01	0		3.01
				ATCC 21052	Draft	AFZY00000000.1				2.87
				CASL	Draft	AFYD00000000.1				2.85
				HN001	Draft	NZ_ABWJ00000000.1	2.87	2	8.75/31.54	2.91
				LMS2-1	Draft	NZ_ACIZ00000000.1				3.11
				MTCC 5462	Draft	AEYM01000000				2.52
				R0011	Draft	AGKC00000000.1				2.9
Lactobacillus ruminis		91	17649	ATCC 27782	Complete	NC_015975.1	2.06	0		2.06
				ATCC 25644	Draft	NZ_ACGS00000000.2				2.1
				SPM0211	Draft	NZ_AFOJ00000000.1				2.17
Lactobacillus sakei	1	358	56013	23K	Complete	NC_007576.1	1.88			1.88
Lactobacillus salivarius		391	54093	CECT 5713	Complete	NC_017481.1	1.82	3	44.58/20.42/242.96	2.13
				UCC118	Complete	NC_007929.1	1.82	3	242.43/20.41/44.01	2.13
				ACS-116-V-Col5a	Draft	NZ_AEBA00000000.1				2.04
				ATCC 11741	Draft	NZ_ACGT00000000.1				2
				GJ-24	Draft	AFOI00000000.1				2
				NIAS840	Draft	AFMN00000000.1				2.05
				SMXD51	Draft	AICL00000000.1				1.97
Lactobacillus sanfranciscensis		353	644	TMW 1.1304	Complete	NC_015978.1	1.29	2	58.73/18.71	1.37
Lactobacillus similis	7		1
Lactobacillus sp. pep8			50
Lactobacillus sp. RKY2			59
Lactobacillus spicheri	39		1
Lactobacillus tucceti	33
Lactobacillus ultunensis			10070	DSM 16047	Draft	NZ_ACGU00000000.1				2.17
Lactobacillus vaccinostercus	47	119	11
Lactobacillus vaginalis	6		16212	ATCC 49540	Draft	NZ_ACGV00000000.1				1.81
Lactobacillus versmoldensis	47		27	KCTC 3814	Draft	NZ_BACR00000000.1				2.4
Lactobacillus zeae			136	KCTC 3804	Draft	NZ_BACQ00000000.1				3.11
Lactobacillus zymae	30
The gray-shaded rows show Lactobacillus strains which our procedure indicates are positively present in ZC2.
